# Supplementary material for: Procyanidin A1 Alleviates Inflammatory Response induced by LPS through NF-κB, MAPK, and Nrf2/HO-1 Pathways in RAW264.7 cells
Source: PubMed Central journal article supplement (PMC6803657; doi:10.1038/s41598-019-51614-x), 2019-10-21

## **Procyanidin A1 Alleviates Inflammatory Response induced by LPS through NF- $\kappa$ B, MAPK, and Nrf2/HO-1 Pathways in RAW264.7 cells**

Shan Han<sup>1,2#</sup>, Hongwei Gao<sup>1,2#</sup>, Shaoru Chen<sup>3</sup>, Qinqin Wang<sup>1,2</sup>, Xinxing Li<sup>1,2</sup>, Li-Jun Du<sup>4</sup>, Jun Li<sup>5</sup>, Ying-Ying Luo<sup>5</sup>, Jun-Xiu Li<sup>1,2</sup>, Li-Chun Zhao<sup>1,2\*</sup>, Jianfang Feng<sup>1,2\*</sup>, Shilin Yang<sup>1,2</sup>

<sup>1</sup> College of Pharmacy, Guangxi University of Chinese Medicine, Nanning 530000, China; <sup>2</sup> Guangxi Engineering Technology Research Center of Advantage Chinese Patent Drug and Ethnic Drug Development, Nanning, 530020; <sup>3</sup> Department of Integrative Medical Sciences, Northeast Ohio Medical University, Rootstown, Ohio 44272, USA <sup>4</sup> School of Life Sciences, Tsinghua University, Beijing 100084, China; <sup>5</sup> State Key Laboratory of Innovative Drug and Efficient Energy-Saving Pharmaceutical Equipment, Jiangxi University of Traditional Chinese Medicine, Nanchang 330004, China;

**Running Title:** Procyanidin A1 shows anti-inflammatory activity

# Shan Han and Hongwei Gao equally contributed to this work.

\*Co-corresponding Authors:

Dr. Li-Chun Zhao; Email: [hyzlc@126.com](mailto:hyzlc@126.com); Address: College of Pharmacy, Guangxi University of Chinese Medicine, Nanning 530000, China; Tel: +86-771-4953513 Fax: +86-771-4953513

Dr. Jian-Fang Feng; Email: [fengjianfang@vip.163.com](mailto:fengjianfang@vip.163.com); Address: College of Pharmacy, Guangxi University of Chinese Medicine, Nanning 530000, China; Tel: +86-771-4953513 Fax: +86-771-4953513

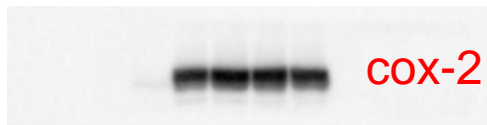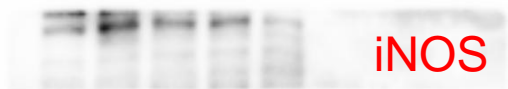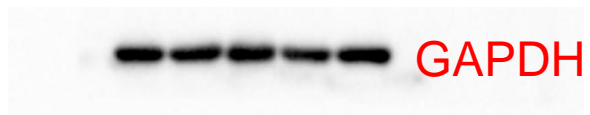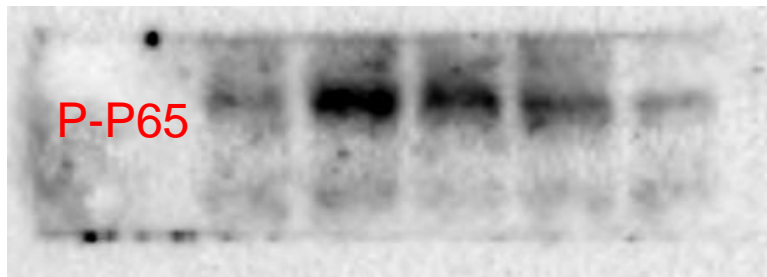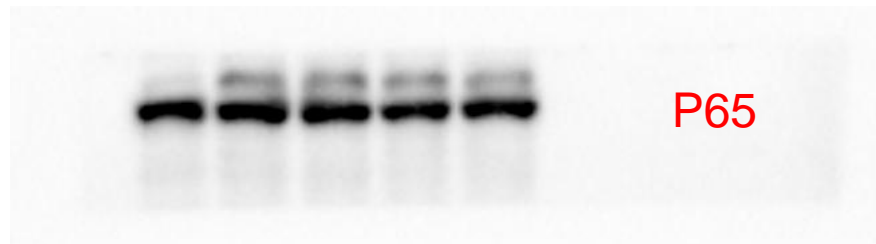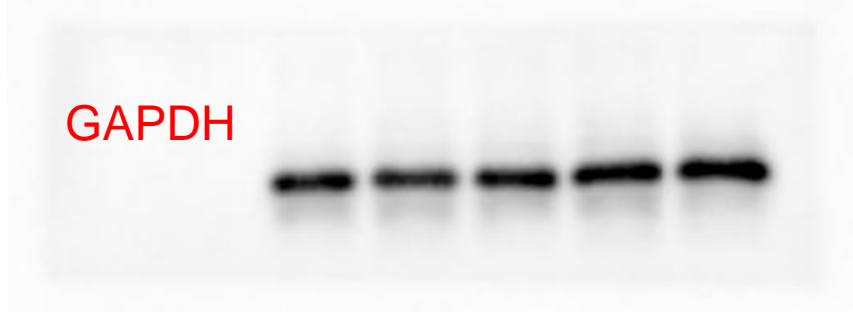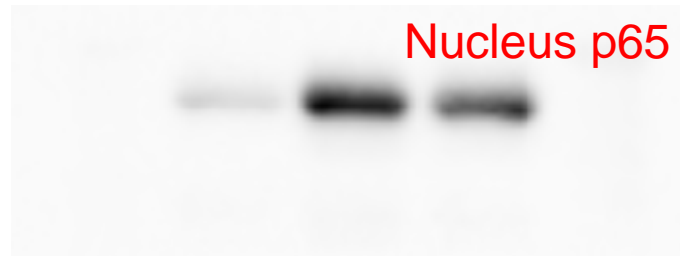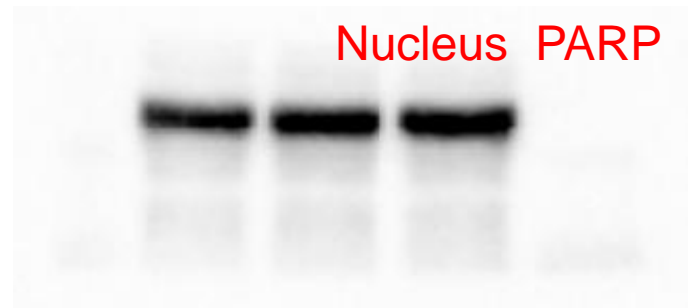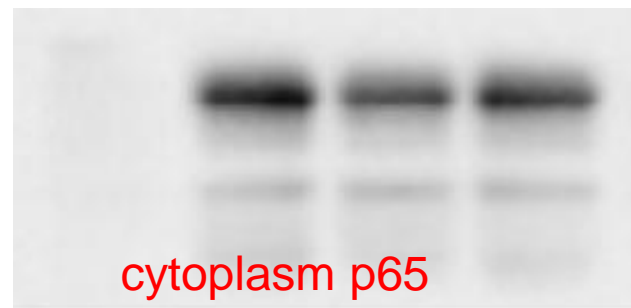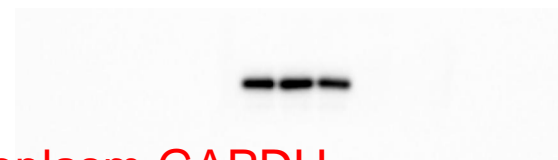

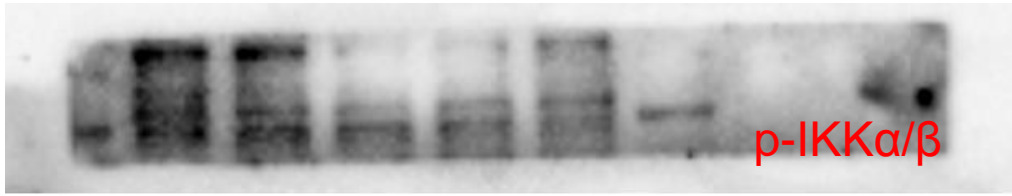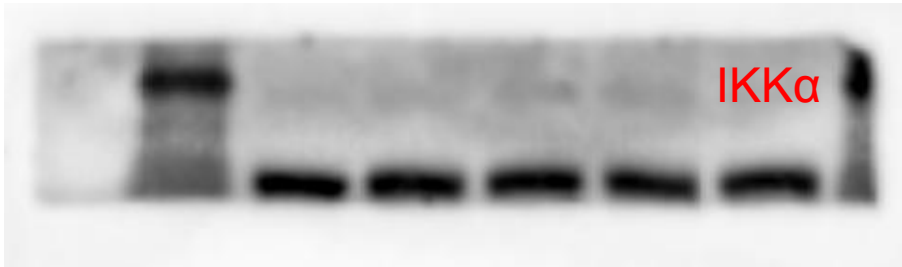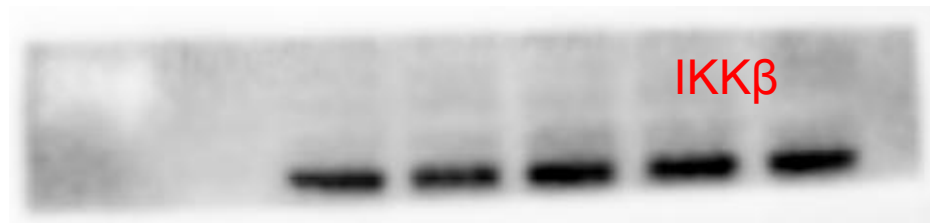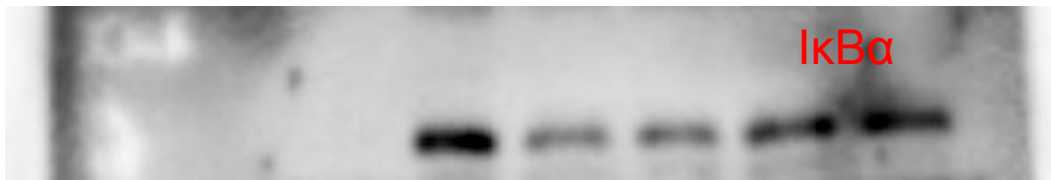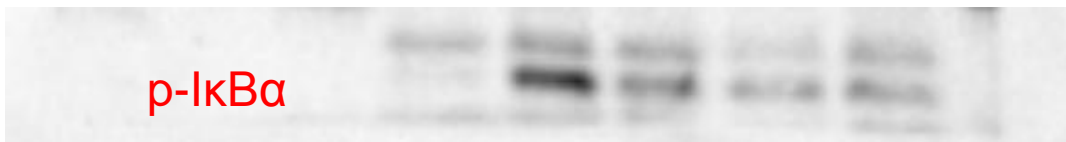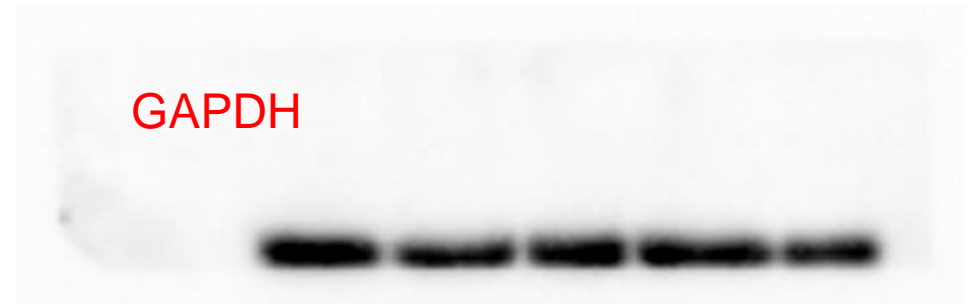

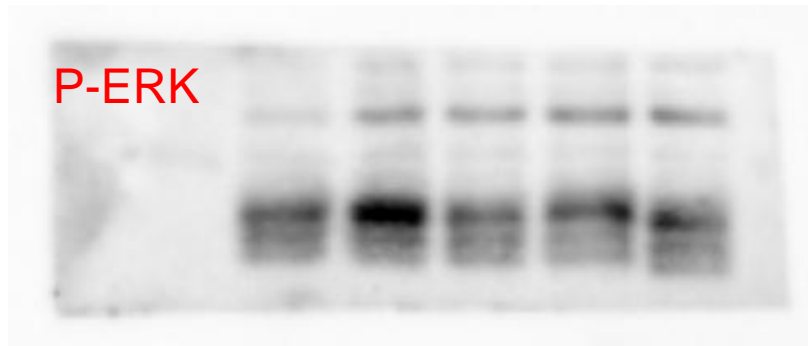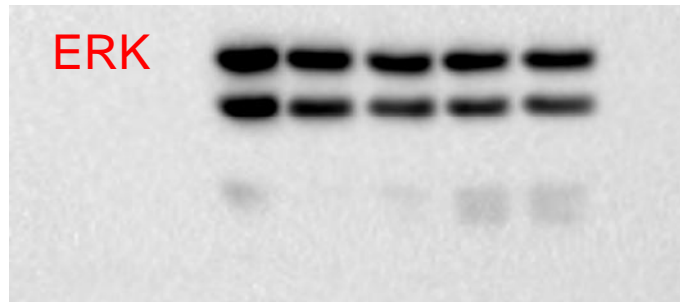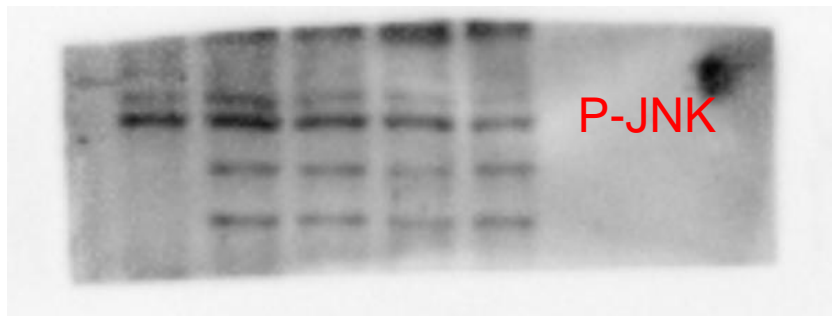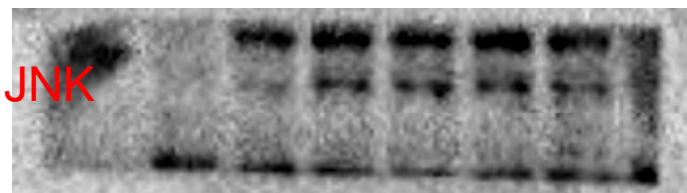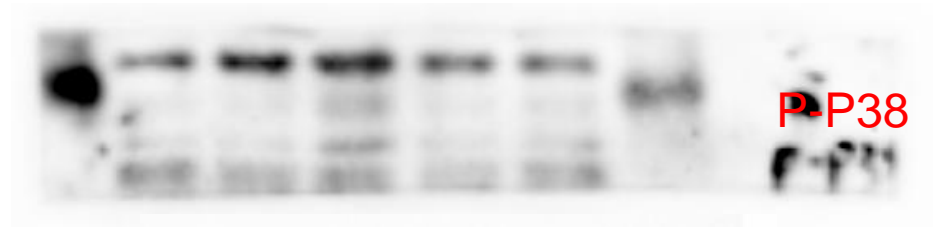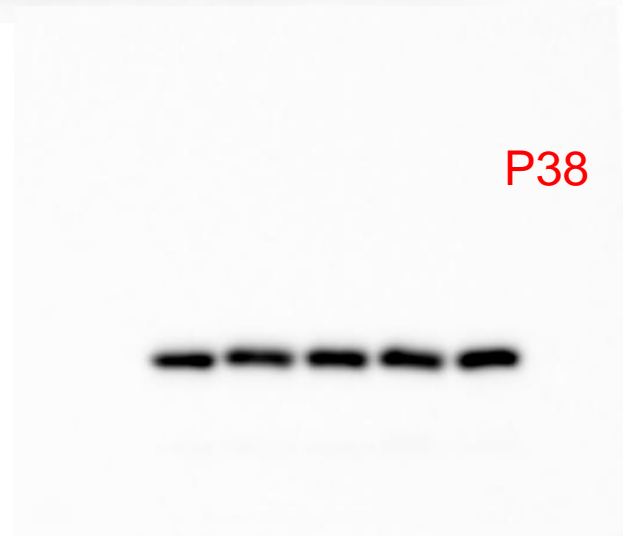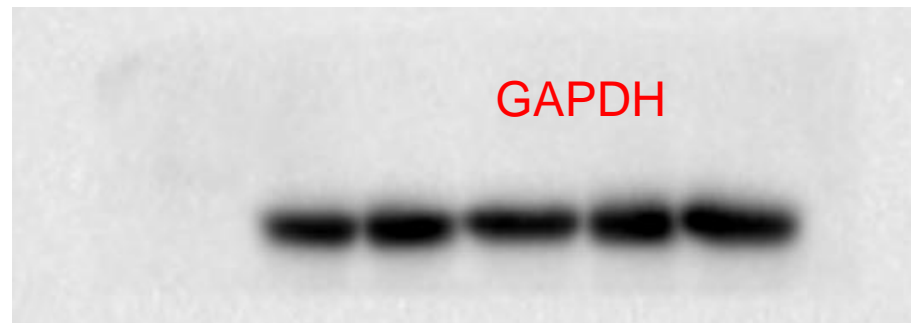

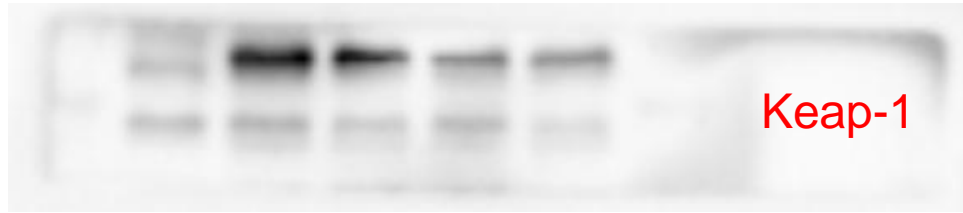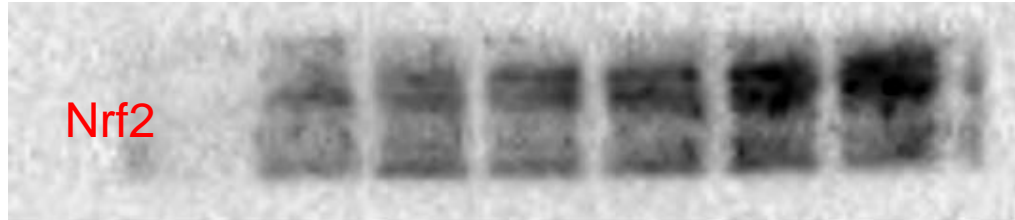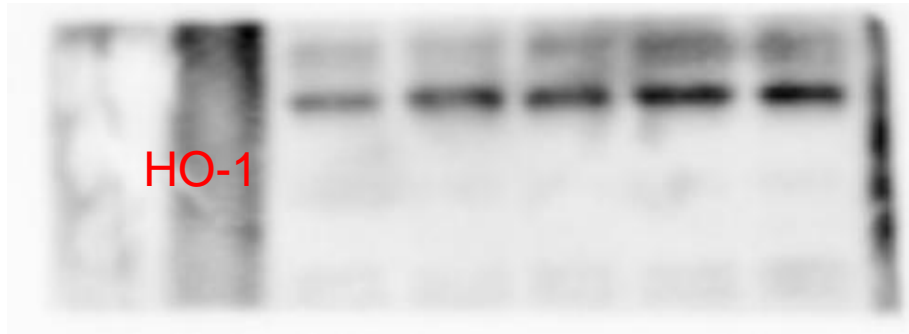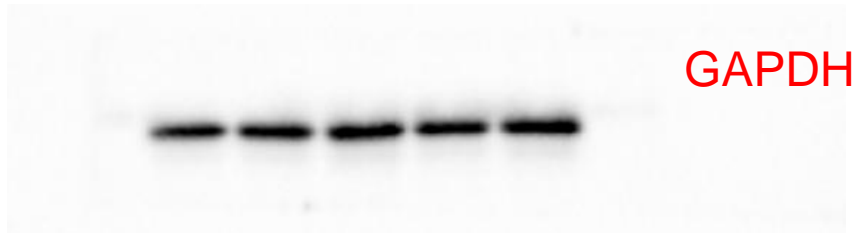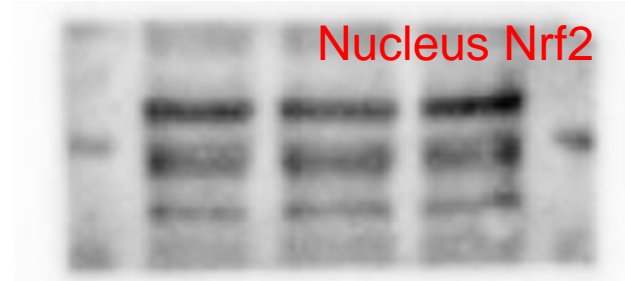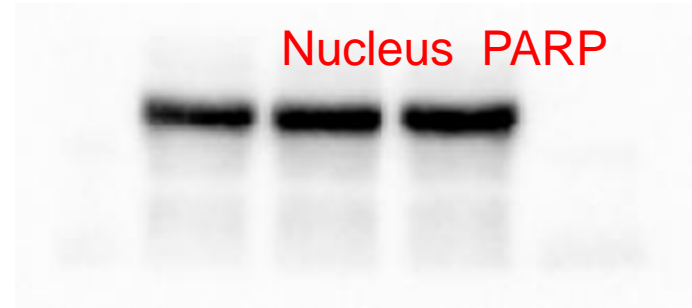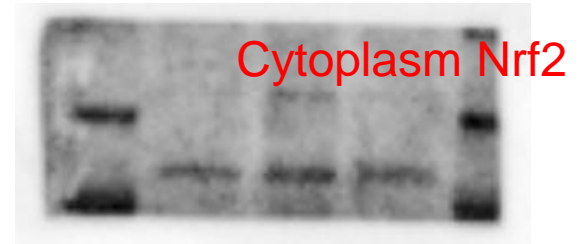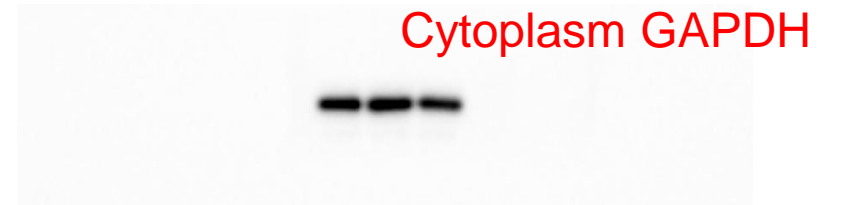

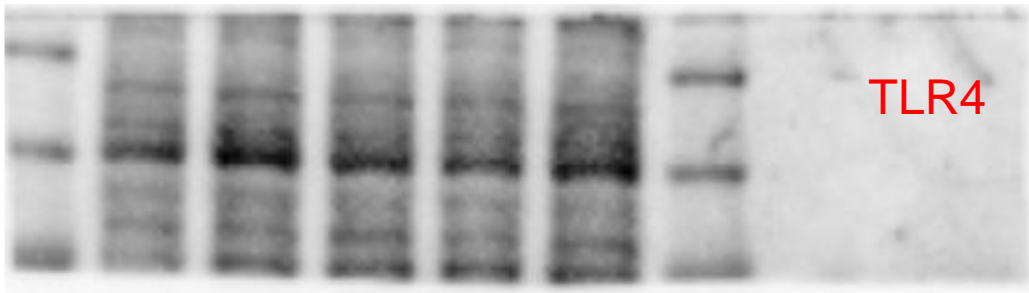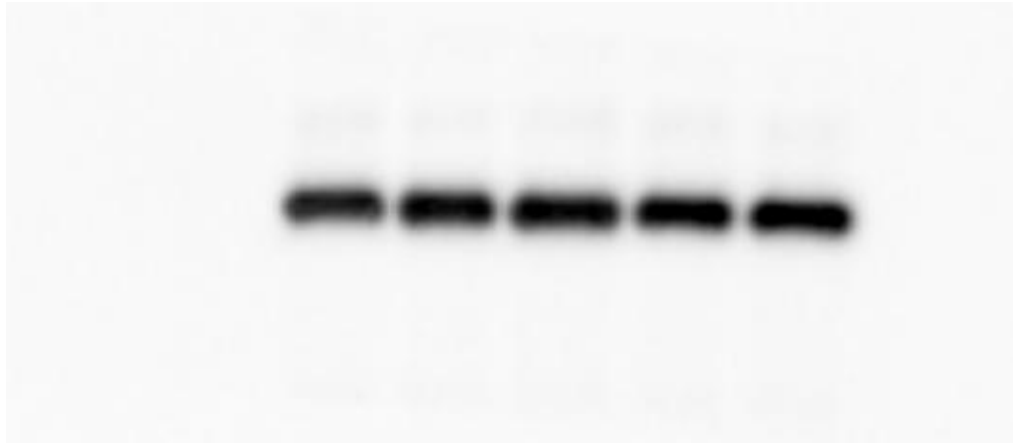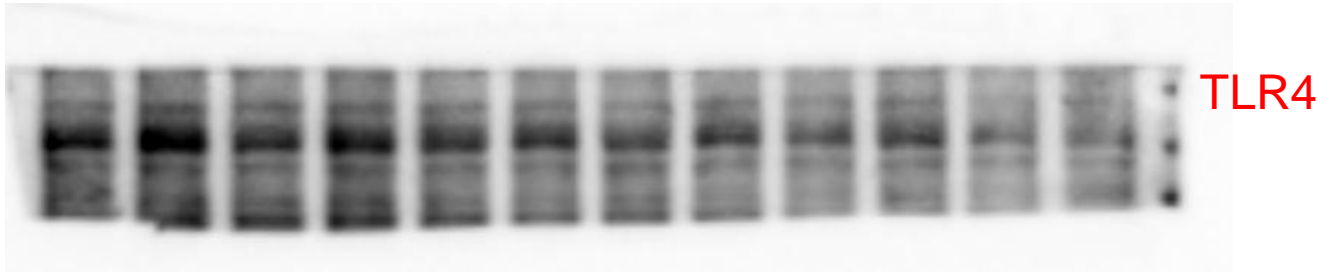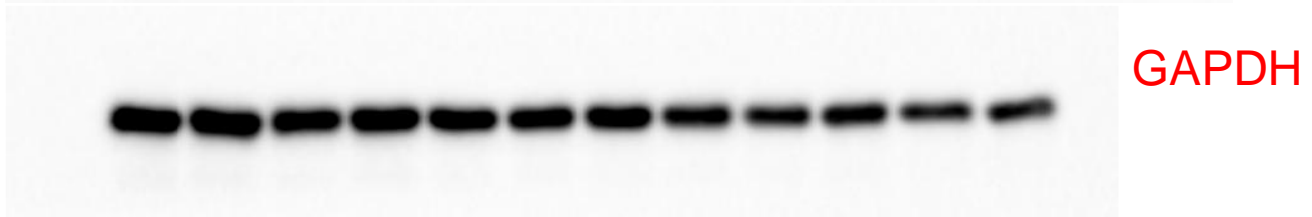

Supplement: 41598_2019_51614_MOESM1_ESM.pdf [file 41598_2019_51614_MOESM1_ESM.pdf]
